# Supplementary material
Source: PubMed Central journal article supplement (PMC3433104)
Supplement: ajcr0002-0549-f3.pdf [file ajcr0002-0549-f3.pdf]

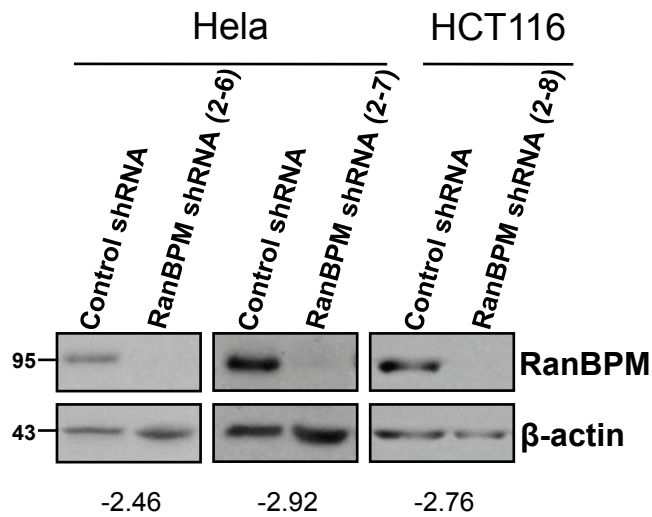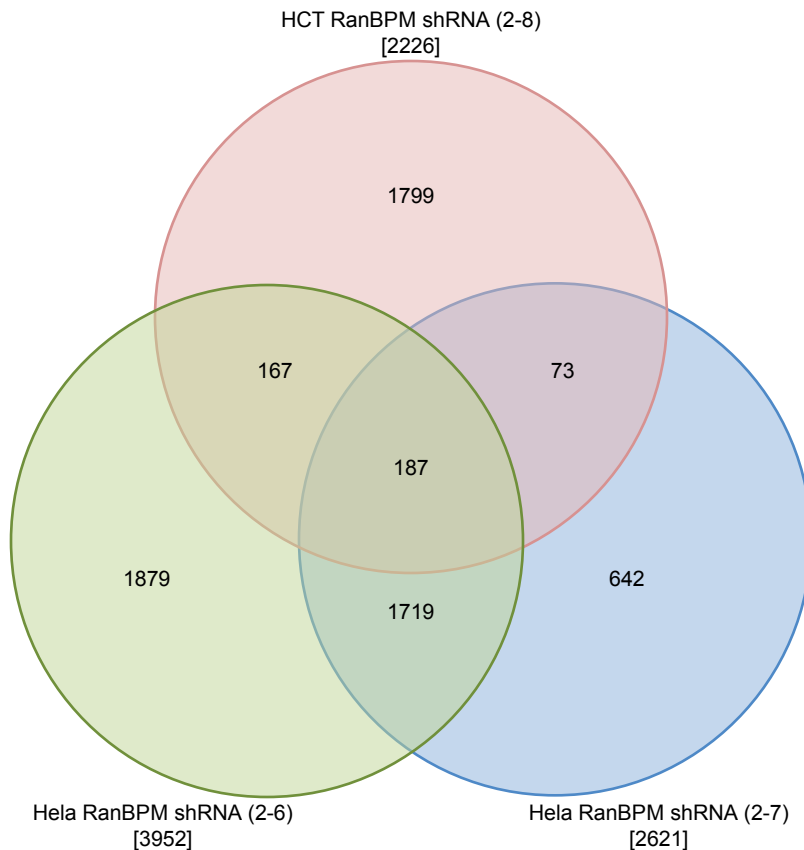

**Supplementary Figure 1. Analysis of HeLa and HCT116 stable cell lines. Top panel.** Whole cell extracts from HeLa control shRNA, RanBPM shRNA (2-6), and RanBPM shRNA (2-7); and HCT control shRNA and RanBPM shRNA (2-8) were analyzed by western blotting and decreased RanBPM expression was verified by hybridizing with a RanBPM antibody. The fold decrease in mRNA expression for each cell line is indicated below the respective western blot for that cell line. **Bottom panel.** Venn diagram of differentially expressed genes in RanBPM shRNA cell lines. The total number of differentially expressed genes for each cell line is indicated in square brackets, and the number of genes with altered expression common between cell lines is denoted within overlapping regions of circles.

**Supplementary Table 1.** Primers for candidate gene validation by RT-qPCR

| Gene          | Forward Primer                  | Reverse Primer                  |
|---------------|---------------------------------|---------------------------------|
| RON (MST1R)   | 5' AGGGTGTGGAGCGCTGTTGTG 3'     | 5' CTTCCAGGCCAGGCGGGTTG 3'      |
| ELF3 (ESE-1)  | 5' AGAAGAGCAAGCACGCGCCC 3'      | 5' AGCCTCGGAGCGCAGGAAC 3'       |
| MSLN1         | 5' AGGCTCAGCGCCACGCACTC 3'      | 5' CCAGGGAGGGAGGCACCGTG 3'      |
| ALDH1A3       | 5' AGGCGGAGCGTGGAGTATGC 3'      | 5' ACTGCTTTTGATCAATCTGAGGCC 3'  |
| CHN1          | 5' TTCAAGGTGCATACATTCAGAGGGC 3' | 5' ACCACAATCTGCACATTTCACTCCC 3' |
| LAMB3         | 5' CCATTGCAGCCAGGCTCCCC 3'      | 5' GCTCGGCTCCTGGCTTCCTC 3'      |
| TG2 (TGM2)    | 5' ACCTCATCAAGGTGCGGGCC 3'      | 5' TGGGCTCCCCAAGGATCCGG 3'      |
| L1CAM         | 5' CGCAGCAAGGGCGGCAAATAC 3'     | 5' TCTCCAGGGACCTGTACTCGC 3'     |
| PHD3 (EGLN3)  | 5' GCCACGTGGACAACCCCAACG 3'     | 5' CAGGATCCCACCATGTAGCTTGGC 3'  |
| MFAP5 (MAGP2) | 5' TCAGCAGCCAAAGGACTCGGTG 3'    | 5' CCCAGGGGTATCCAGTCAGAGG 3'    |
| RAB27B        | 5' CGGGACAAGAGCGGTTCCGG 3'      | 5' GCTTGCAGTTGGCTCATCCAGT 3'    |

RON, recepteur d'origine nantais/macrophage stimulating receptor 1 (MST1R); ELF3, E74-like factor 3 (ESE-1); MSLN1, mesothelin 1; ALDH1A3, aldehyde dehydrogenase 1 isoform A3; CHN1, chimerin 1; LAMB3, laminin $\beta$  3; TG2, transglutaminase 2 (TGM2); L1CAM, L1 cell adhesion molecule; PHD3, prolyl hydroxylase 3 (EGLN3); MFAP5, microfibrillar associated protein 5 (MAGP2); RAB27B, RAB27B member Ras oncogene family.

**Supplementary Table 2.** List of genes affected by RanBPM down-regulation

| Gene Symbol                 | Accession No. | Hela RanBPM sh (2-6) |             | Hela RanBPM sh (2-7) |             | HCT RanBPM sh (2-8) |             |
|-----------------------------|---------------|----------------------|-------------|----------------------|-------------|---------------------|-------------|
|                             |               | p-value              | Fold Change | p-value              | Fold Change | p-value             | Fold Change |
| <b>Down-regulated Genes</b> |               |                      |             |                      |             |                     |             |
| MLLT11                      | NM_006818     | 1.21E-05             | -1.94805    | 0.000178             | -1.65798    | 0.007683            | -1.42647    |
| PLA2G4A                     | NM_024420     | 0.000994             | -1.98148    | 0.024978             | -1.50694    | 0.103914            | -1.38663    |
| CAMSAP1L1                   | NM_203459     | 0.000186             | -1.28092    | 0.000756             | -1.23381    | 0.000425            | -1.2971     |
| C1orf71                     | NM_152609     | 0.000365             | -1.26617    | 5.95E-06             | -1.43517    | 0.0055              | -1.20895    |
| PTGS2                       | NM_000963     | 0.001552             | -2.23247    | 7.75E-05             | -3.13005    | 0.414784            | -1.21651    |
| KDM5B                       | NM_006618     | 0.238379             | -1.20273    | 0.236682             | -1.20358    | 0.099806            | -1.35748    |
| ADD3                        | NM_016824     | 0.143779             | -1.20664    | 0.000316             | -1.7965     | 0.173044            | -1.22262    |
| KLC2                        | NM_022822     | 7.57E-06             | -1.45389    | 0.000219             | -1.30358    | 0.008601            | -1.20564    |
| PANX1                       | NM_015368     | 0.016856             | -1.28365    | 0.064952             | -1.20168    | 0.101339            | -1.20387    |
| TARBP2                      | NM_134323     | 1.36E-07             | -1.49385    | 1.64E-07             | -1.48434    | 0.001023            | -1.20971    |
| NAV3                        | NM_014903     | 0.035093             | -1.25264    | 0.004963             | -1.38175    | 5.98E-07            | -2.70703    |
| ISCU                        | NM_014301     | 1.11E-07             | -1.56273    | 6.43E-08             | -1.59608    | 1.68E-05            | -1.38687    |
| RERG                        | NM_032918     | 0.079681             | -1.38315    | 0.011972             | -1.64535    | 0.022004            | -1.66901    |
| SSH1                        | NM_001161330  | 0.016604             | -1.2583     | 0.019562             | -1.24929    | 6.79E-05            | -1.74098    |
| GNG2                        | NM_053064     | 0.000117             | -1.56726    | 0.010662             | -1.28025    | 0.076577            | -1.20227    |
| ADAM21                      | NM_003813     | 0.23321              | -1.23904    | 0.248423             | -1.23016    | 0.364157            | -1.20459    |
| ADAM21                      | NM_003813     | 0.00646              | -1.49927    | 0.007953             | -1.47916    | 0.053203            | -1.35929    |
| ATPBD4                      | NM_080650     | 0.004968             | -1.38728    | 0.027314             | -1.27256    | 0.125026            | -1.20153    |
| MNS1                        | NM_018365     | 0.00212              | -1.24488    | 0.004023             | -1.22116    | 0.010258            | -1.21957    |
| MFGE8                       | NM_005928     | 0.000291             | -2.09135    | 0.003832             | -1.69699    | 0.303244            | -1.20496    |
| FGF11                       | NM_004112     | 0.146057             | -1.30058    | 0.212872             | -1.24941    | 0.302136            | -1.23479    |
| STARD3                      | NM_006804     | 1.64E-06             | -1.32588    | 2.20E-06             | -1.31601    | 0.000174            | -1.22799    |
| PITPNC1                     | NM_181671     | 7.03E-05             | -2.5873     | 2.73E-06             | -3.68728    | 0.038723            | -1.55431    |
| FXR2                        | NM_004860     | 1.81E-05             | -1.24529    | 3.34E-05             | -1.22921    | 0.000213            | -1.21627    |
| ALDOC                       | NM_005165     | 0.047679             | -1.53452    | 0.08642              | -1.43808    | 0.297333            | -1.27832    |
| GPR125                      | NM_145290     | 0.002301             | -1.27392    | 0.001747             | -1.28586    | 0.020897            | -1.21458    |
| MRPL34                      | NM_023937     | 1.87E-07             | -1.58934    | 4.04E-08             | -1.69516    | 2.88E-05            | -1.39995    |
| OLFM2                       | NM_058164     | 0.005177             | -1.79105    | 0.017936             | -1.60066    | 0.152458            | -1.35655    |
| ZNF585B                     | NM_152279     | 0.061216             | -1.31428    | 0.007418             | -1.52573    | 1.61E-05            | -2.78181    |
| TANK                        | NM_004180     | 0.031553             | -1.23583    | 0.040896             | -1.22079    | 5.57E-05            | -1.81299    |
| CHN1                        | NM_001822     | 0.032715             | -1.23527    | 0.005214             | -1.34482    | 0.000319            | -1.6401     |
| SATB2                       | NM_015265     | 7.03E-05             | -1.53953    | 0.002165             | -1.33286    | 0.004687            | -1.34527    |
| SCG2                        | NM_003469     | 0.158392             | -1.3339     | 0.004688             | -1.92649    | 0.122777            | -1.44325    |
| SERPINE2                    | NM_001136529  | 0.004115             | -1.94032    | 0.353875             | -1.20136    | 0.415976            | -1.20337    |
| SPTLC3                      | NM_018327     | 3.38E-07             | -2.4565     | 2.13E-06             | -2.14408    | 0.078923            | -1.23241    |
| JAG1                        | NM_000214     | 0.002957             | -1.98526    | 0.262645             | -1.24633    | 0.048062            | -1.60611    |
| GGT7                        | NM_178026     | 0.023076             | -1.2819     | 0.023451             | -1.28085    | 0.066558            | -1.24981    |
| TGM2 (TG2)                  | NM_004613     | 0.000265             | -1.8711     | 0.000145             | -1.95422    | 0.013533            | -1.51768    |
| ADRBK2                      | NM_005160     | 2.26E-07             | -1.89169    | 6.79E-06             | -1.59868    | 0.00937             | -1.25698    |
| MRAS                        | NM_012219     | 7.07E-06             | -2.08349    | 6.24E-05             | -1.80706    | 0.10427             | -1.22871    |
| ST6GAL1                     | NM_173216     | 0.032866             | -1.25882    | 0.07527              | -1.20493    | 0.002218            | -1.52625    |
| TBC1D5                      | NM_014744     | 1.17E-08             | -2.1308     | 2.04E-07             | -1.81176    | 0.002122            | -1.30354    |
| TNNC1                       | NM_003280     | 0.001453             | -1.47697    | 2.47E-05             | -1.85436    | 0.012205            | -1.38503    |

|                 |              |          |          |          |          |          |          |
|-----------------|--------------|----------|----------|----------|----------|----------|----------|
| CBLB            | NM_170662    | 0.007236 | -1.42617 | 0.002102 | -1.5327  | 0.084496 | -1.27219 |
| METT5D1         | NM_001113528 | 0.00128  | -1.24527 | 0.003228 | -1.2131  | 0.011145 | -1.20096 |
| B3GALNT1        | NM_001038628 | 0.000834 | -1.51373 | 0.01342  | -1.31586 | 0.057748 | -1.2595  |
| DCUN1D1         | NM_020640    | 0.000928 | -1.42207 | 0.036882 | -1.21187 | 0.074415 | -1.20334 |
| TBC1D19         | NM_018317    | 0.032104 | -1.20661 | 0.009704 | -1.26742 | 1.95E-06 | -2.0792  |
| SLC7A11         | NM_014331    | 0.082537 | -1.39848 | 0.198453 | -1.27329 | 0.35226  | -1.21972 |
| MAML3           | NM_018717    | 0.000345 | -4.52242 | 0.154621 | -1.60779 | 0.480286 | -1.30168 |
| PDGFC           | NM_016205    | 0.0048   | -1.70882 | 0.033856 | -1.45408 | 0.10861  | -1.36899 |
| C5orf23         | BC022250     | 0.000247 | -1.92466 | 0.138662 | -1.22998 | 0.223455 | -1.21372 |
| PCDHB16         | NM_020957    | 1.73E-06 | -2.43184 | 0.000753 | -1.60758 | 0.163017 | -1.20361 |
| RUNX2           | NM_001024630 | 0.017366 | -1.36279 | 0.002717 | -1.52094 | 0.000885 | -1.75488 |
| DCBLD1          | NM_173674    | 0.000158 | -1.97271 | 0.016803 | -1.42643 | 0.032132 | -1.43175 |
| C6orf211        | BC011348     | 0.001046 | -1.53886 | 0.000473 | -1.60851 | 0.027219 | -1.34316 |
| SERPINB9        | NM_004155    | 0.029804 | -1.41724 | 0.04754  | -1.36721 | 0.24506  | -1.22258 |
| RANBP9 (RANBPM) | NM_005493    | 1.21E-09 | -2.46026 | 1.37E-10 | -2.92317 | 1.62E-09 | -2.76113 |
| POPDC3          | NM_022361    | 1.20E-07 | -3.88063 | 2.63E-06 | -2.80793 | 0.09013  | -1.3191  |
| MAN1A1          | NM_005907    | 0.288781 | -1.44414 | 0.000247 | -5.24997 | 0.22326  | -1.63354 |
| CHN2            | NM_004067    | 0.001171 | -1.33711 | 0.006346 | -1.25631 | 2.55E-06 | -1.8985  |
| GNAI1           | NM_002069    | 0.001221 | -1.30292 | 0.000605 | -1.33507 | 0.001019 | -1.36712 |
| ANKIB1          | NM_019004    | 2.15E-09 | -1.99628 | 3.42E-09 | -1.94551 | 1.09E-05 | -1.46284 |
| FLJ30064        | AK054626     | 0.01189  | -1.23465 | 0.012042 | -1.23407 | 0.043007 | -1.20536 |
| PRKAR2B         | NM_002736    | 0.000345 | -1.51304 | 0.00927  | -1.30104 | 0.008693 | -1.35962 |
| ELMO1           | NM_014800    | 3.04E-10 | -5.47252 | 2.36E-09 | -4.22104 | 0.062438 | -1.26619 |
| JHDM1D          | NM_030647    | 0.302832 | -1.22543 | 0.224297 | -1.2735  | 0.007075 | -2.01056 |
| SQLE            | NM_003129    | 0.020406 | -1.36587 | 0.05015  | -1.29043 | 0.024161 | -1.41606 |
| IMPAD1          | NM_017813    | 0.000616 | -1.37208 | 0.004268 | -1.27602 | 0.001434 | -1.38843 |
| FBXO32          | NM_058229    | 0.167727 | -1.43967 | 0.185763 | -1.41688 | 0.474234 | -1.23644 |
| NR0B1           | NM_000475    | 9.24E-05 | -1.35907 | 0.002862 | -1.22408 | 0.009061 | -1.21559 |
| TMSB15A         | NM_021992    | 0.002399 | -1.50078 | 0.005968 | -1.42557 | 0.024515 | -1.37353 |
| CAPN6           | NM_014289    | 0.016089 | -1.44132 | 0.001392 | -1.70707 | 8.87E-07 | -3.77299 |
| CLIC2           | NM_001289    | 0.00057  | -2.21894 | 0.03483  | -1.5143  | 0.233111 | -1.28961 |

#### Up-regulated Genes

|              |              |          |         |          |         |          |         |
|--------------|--------------|----------|---------|----------|---------|----------|---------|
| TMEM56       | NM_152487    | 1.54E-05 | 1.58243 | 0.00012  | 1.45086 | 0.008575 | 1.27857 |
| AMY2A        | NM_000699    | 0.000197 | 1.89055 | 0.002425 | 1.59469 | 0.088113 | 1.30332 |
| DNM3         | NM_015569    | 3.70E-05 | 2.27619 | 0.055299 | 1.32742 | 0.218419 | 1.22254 |
| ELF3 (ESE-1) | NM_001114309 | 8.38E-10 | 5.40777 | 1.61E-08 | 3.76364 | 0.603446 | 1.20112 |
| DUSP5P       | NR_002834    | 0.00013  | 1.85352 | 0.000592 | 1.68014 | 0.116147 | 1.25092 |
| DUSP5P       | AK055963     | 0.000346 | 1.71938 | 0.025532 | 1.32929 | 0.127985 | 1.23605 |
| DHRS3        | NM_004753    | 0.00122  | 4.07971 | 0.240084 | 1.52307 | 0.39393  | 1.41615 |
| PPAP2B       | NM_003713    | 1.56E-05 | 1.6272  | 0.000849 | 1.37031 | 0.035165 | 1.21952 |
| GBP1         | NM_002053    | 3.57E-06 | 1.89229 | 4.01E-05 | 1.65635 | 0.02618  | 1.2726  |
| LAMB3        | NM_001017402 | 0.009577 | 1.46725 | 0.000151 | 1.94691 | 0.152389 | 1.24829 |
| TSPAN15      | NM_012339    | 8.49E-08 | 2.99291 | 2.66E-06 | 2.24679 | 0.066734 | 1.26809 |
| C10orf116    | NM_006829    | 0.0553   | 1.31188 | 0.128643 | 1.23276 | 0.209614 | 1.2172  |
| FAM107B      | BC072452     | 0.00045  | 1.36372 | 0.007201 | 1.23625 | 0.002459 | 1.33376 |
| FAM111B      | NM_198947    | 0.001288 | 1.47392 | 0.003448 | 1.403   | 0.005367 | 1.44156 |
| PLCB3        | NM_000932    | 1.73E-06 | 1.23013 | 3.31E-06 | 1.21553 | 9.54E-06 | 1.22635 |

|               |              |          |         |          |         |          |         |
|---------------|--------------|----------|---------|----------|---------|----------|---------|
| TCIRG1        | NM_006019    | 3.70E-06 | 1.42594 | 6.37E-05 | 1.30811 | 0.00066  | 1.26936 |
| PRSS23        | NM_007173    | 0.085484 | 1.21509 | 0.072644 | 1.22687 | 0.015928 | 1.39761 |
| GLB1L2        | NM_138342    | 0.000199 | 1.29167 | 0.000331 | 1.27335 | 0.004537 | 1.21882 |
| IFITM3        | NM_021034    | 0.001053 | 1.52729 | 0.038999 | 1.2609  | 0.138539 | 1.20209 |
| PRKCDBP       | NM_145040    | 0.014525 | 1.2689  | 0.012701 | 1.27643 | 0.007472 | 1.36171 |
| IL18          | NM_001562    | 0.014599 | 1.47751 | 0.0954   | 1.28318 | 0.178973 | 1.2554  |
| EMP1          | NM_001423    | 0.00031  | 2.03037 | 0.028562 | 1.43137 | 0.112893 | 1.33105 |
| SRGAP1        | NM_020762    | 0.010734 | 1.2594  | 0.028893 | 1.20969 | 7.36E-06 | 1.89828 |
| MFAP5 (MAGP2) | NM_003480    | 5.91E-08 | 3.81188 | 2.38E-06 | 2.63256 | 0.18677  | 1.21632 |
| PRICKLE1      | NM_153026    | 0.000865 | 2.53978 | 0.262914 | 1.28881 | 0.097997 | 1.56251 |
| PCOTH         | NM_001014442 | 0.12575  | 1.22419 | 0.00932  | 1.45778 | 0.141202 | 1.25062 |
| LHFP          | NM_005780    | 7.48E-06 | 2.2658  | 0.000544 | 1.68312 | 0.00088  | 1.76235 |
| THTPA         | NM_024328    | 1.22E-06 | 1.24314 | 7.77E-06 | 1.20133 | 1.37E-05 | 1.22202 |
| PLEKHG3       | NM_015549    | 1.15E-06 | 1.64696 | 1.93E-06 | 1.6097  | 0.005157 | 1.25555 |
| LOC388022     | AK131040     | 0.006072 | 1.35422 | 0.000188 | 1.61103 | 0.000306 | 1.68425 |
| AP1G2         | NM_003917    | 5.58E-05 | 1.33624 | 0.00045  | 1.25886 | 0.003594 | 1.22432 |
| DHRS1         | NM_001136050 | 3.93E-05 | 1.78477 | 0.001618 | 1.45926 | 0.074394 | 1.23808 |
| EGLN3 (PHD3)  | NM_022073    | 0.000231 | 1.62416 | 0.000185 | 1.64412 | 0.069996 | 1.24591 |
| FBLN5         | NM_006329    | 0.000478 | 2.09136 | 0.021841 | 1.51535 | 0.330412 | 1.20486 |
| ALDH1A3       | NM_000693    | 6.93E-06 | 2.48605 | 0.00035  | 1.83368 | 0.057367 | 1.35584 |
| MEIS2         | NM_172316    | 0.000981 | 1.25657 | 0.000674 | 1.2704  | 0.000562 | 1.32651 |
| MSLN          | NM_005823    | 0.000596 | 1.90214 | 0.033952 | 1.40282 | 0.085631 | 1.35907 |
| TMC5          | NM_001105248 | 0.00043  | 1.96946 | 0.097664 | 1.29488 | 0.101966 | 1.34208 |
| HSD3B7        | NM_025193    | 1.63E-06 | 1.53082 | 8.75E-05 | 1.33532 | 0.000159 | 1.36754 |
| C16orf93      | NM_001014979 | 0.002815 | 1.25639 | 0.009185 | 1.20921 | 0.008974 | 1.24636 |
| CDRT1         | NM_006382    | 0.000198 | 1.73327 | 0.048062 | 1.26431 | 0.005323 | 1.51366 |
| CDRT1         | NM_006382    | 0.000479 | 1.62109 | 0.005343 | 1.41757 | 0.022817 | 1.36553 |
| ULK2          | NM_014683    | 9.18E-05 | 1.42662 | 8.44E-05 | 1.43116 | 0.000574 | 1.39582 |
| RDM1          | NM_145654    | 0.03303  | 1.24351 | 0.059623 | 1.20757 | 0.077494 | 1.22423 |
| HOXB5         | NM_002147    | 0.000807 | 1.57366 | 0.025996 | 1.30036 | 0.019123 | 1.38102 |
| HOXB6         | NM_018952    | 0.000211 | 1.85847 | 0.010196 | 1.44224 | 0.046166 | 1.36399 |
| SCARNA17      | NR_003003    | 0.000681 | 1.33125 | 0.002274 | 1.27697 | 0.022463 | 1.21306 |
| RAB27B        | NM_004163    | 0.000319 | 2.14986 | 0.041343 | 1.42978 | 0.098696 | 1.38312 |
| PMAIP1        | NM_021127    | 0.000322 | 1.33759 | 0.001166 | 1.28228 | 1.17E-05 | 1.60819 |
| PSTPIP2       | NM_024430    | 1.83E-06 | 1.63595 | 5.71E-05 | 1.42369 | 0.000187 | 1.43202 |
| ALPK2         | NM_052947    | 8.31E-06 | 3.5668  | 0.001725 | 2.02592 | 0.365885 | 1.21451 |
| ZNF91         | NM_003430    | 0.000298 | 1.72095 | 0.039344 | 1.28992 | 0.000316 | 1.86383 |
| HNMT          | NM_006895    | 0.009081 | 1.33786 | 0.063227 | 1.21293 | 0.024468 | 1.32208 |
| DKFZp434H1419 | AK125369     | 0.007618 | 1.3181  | 0.007735 | 1.31719 | 0.02096  | 1.30412 |
| EDAR          | NM_022336    | 0.011451 | 1.28525 | 0.049452 | 1.20299 | 0.028749 | 1.27402 |
| GALNT3        | NM_004482    | 5.55E-07 | 2.28147 | 8.67E-07 | 2.20981 | 0.003337 | 1.45717 |
| SCN9A         | NM_002977    | 6.71E-05 | 2.68432 | 0.000236 | 2.36665 | 0.129245 | 1.37881 |
| SLC4A11       | NM_032034    | 4.11E-05 | 1.3121  | 0.000118 | 1.2752  | 2.28E-05 | 1.39485 |
| CTD-2514C3.1  | NR_004846    | 0.001103 | 1.61351 | 0.029639 | 1.32356 | 0.037102 | 1.36039 |
| SDC4          | NM_002999    | 0.022647 | 1.27084 | 0.016157 | 1.29191 | 0.081838 | 1.22376 |
| USP18         | NM_017414    | 0.000457 | 1.70765 | 0.006157 | 1.45632 | 0.11388  | 1.25282 |
| MST1R (RON)   | NM_002447    | 0.000175 | 1.59982 | 1.30E-05 | 1.84799 | 0.003403 | 1.45303 |

|           |               |          |         |          |         |          |         |
|-----------|---------------|----------|---------|----------|---------|----------|---------|
| FRAS1     | NM_025074     | 0.000163 | 1.88825 | 0.018941 | 1.38504 | 0.20981  | 1.20351 |
| ANXA3     | NM_005139     | 0.002405 | 1.30439 | 0.004907 | 1.27043 | 0.029267 | 1.22156 |
| CCDC109B  | NM_017918     | 0.008208 | 1.40159 | 0.004979 | 1.44161 | 0.006451 | 1.50005 |
| TLR3      | NM_003265     | 2.85E-07 | 2.40756 | 1.99E-05 | 1.81232 | 0.060818 | 1.24193 |
| FBXO4     | NM_012176     | 0.020975 | 1.422   | 0.024873 | 1.40495 | 0.229073 | 1.21585 |
| SH3RF2    | NM_152550     | 0.012417 | 1.53236 | 0.028012 | 1.43895 | 0.049957 | 1.44378 |
| ERAP1     | NM_001040458  | 1.38E-06 | 1.63246 | 1.48E-05 | 1.48083 | 0.000436 | 1.37218 |
| MRAP2     | NM_138409     | 2.00E-05 | 2.13295 | 7.38E-06 | 2.30291 | 0.036684 | 1.36787 |
| PLEKHG1   | NM_001029884  | 0.007218 | 1.67107 | 0.041213 | 1.4414  | 0.168728 | 1.31205 |
| MBOAT1    | NM_001080480  | 7.64E-07 | 1.71621 | 1.40E-05 | 1.51059 | 0.006264 | 1.2591  |
| C6orf132  | ENST000003418 | 2.99E-07 | 2.60787 | 1.76E-06 | 2.26832 | 0.012001 | 1.4013  |
| COBL      | NM_015198     | 0.045209 | 1.33178 | 0.075382 | 1.28395 | 0.100709 | 1.30195 |
| MATN2     | NM_002380     | 0.000963 | 1.50342 | 0.00361  | 1.4057  | 0.03654  | 1.29524 |
| RHPN1     | NM_052924     | 0.000123 | 1.29147 | 0.000374 | 1.25316 | 0.004867 | 1.20379 |
| C8orf51   | NR_026785     | 8.67E-07 | 1.27628 | 5.59E-06 | 1.22846 | 8.06E-05 | 1.20001 |
| C8orf73   | NM_001100878  | 0.010437 | 1.37454 | 0.068042 | 1.23581 | 0.010284 | 1.44525 |
| NPR2      | NM_003995     | 1.58E-05 | 1.46282 | 6.67E-05 | 1.38947 | 0.008633 | 1.22615 |
| GRHRP     | NM_012203     | 0.002375 | 1.2851  | 0.015994 | 1.20268 | 0.028042 | 1.20965 |
| FAM189A2  | NM_004816     | 0.026802 | 1.46127 | 0.002051 | 1.79215 | 0.138782 | 1.31887 |
| C9orf3    | AF043897      | 1.69E-05 | 1.48498 | 2.18E-05 | 1.47055 | 2.43E-06 | 1.73043 |
| NIPSNAP3A | NM_015469     | 1.28E-05 | 1.44175 | 0.002957 | 1.21701 | 0.009713 | 1.20717 |
| ARRDC1    | NM_152285     | 4.09E-07 | 1.74846 | 5.70E-07 | 1.72052 | 0.00451  | 1.26792 |
| PTPLAD2   | NM_001010915  | 2.21E-07 | 2.42495 | 3.35E-06 | 2.00393 | 0.032532 | 1.28292 |
| TLE1      | NM_005077     | 7.80E-05 | 1.98957 | 0.000676 | 1.71392 | 0.148742 | 1.24041 |
| HDHD3     | NM_031219     | 0.027341 | 1.21184 | 0.001792 | 1.35297 | 0.022021 | 1.26123 |
| PTRH1     | NM_001002913  | 0.008474 | 1.25899 | 0.023049 | 1.211   | 0.005872 | 1.32616 |
| NPDC1     | NM_015392     | 0.000595 | 1.43109 | 0.001549 | 1.37363 | 0.05301  | 1.21613 |
| SCML1     | NM_001037540  | 3.55E-05 | 1.47592 | 3.27E-06 | 1.63206 | 0.000495 | 1.40074 |
| FAM156A   | NM_014138     | 0.009974 | 1.21367 | 0.000506 | 1.34309 | 0.008815 | 1.25655 |
| GABRE     | NM_004961     | 6.66E-05 | 1.81362 | 0.002293 | 1.47851 | 0.004392 | 1.5082  |
| GABRE     | U92285        | 0.000259 | 2.57423 | 0.041728 | 1.53774 | 0.33932  | 1.24385 |
| L1CAM     | NM_000425     | 0.008882 | 1.31114 | 0.002745 | 1.38376 | 0.032139 | 1.27652 |
